# Supplementary material for: Molecular Signature of Small Cell Lung Cancer after Treatment Failure: The MCM Complex as Therapeutic Target
Source: MDPI journal article supplement (doi:10.3390/cancers13061187), 2021-03-10
Supplement: s1 [file s1]

# Supplementary Materials: Molecular signature of small cell lung cancer after treatment failure: The *MCM* complex as therapeutic target

Shunsuke Misono, Keiko Mizuno, Takayuki Suetsugu, Kengo Tanigawa, Nijiro Nohata, Akifumi Uchida, Hiroki Sanada, Reona Okada, Shogo Moriya, Hiromasa Inoue and Naohiko Seki

Construction of the mRNA expression signature for treatment failure of SCLC

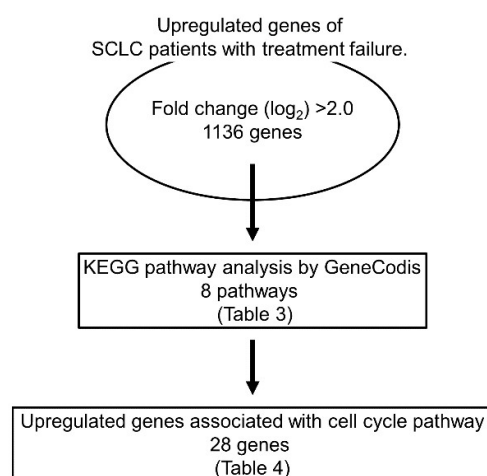

**Figure S1.** Flowchart of the genes upregulated in SCLC compared with normal tissues classified by KEGG pathway analysis.

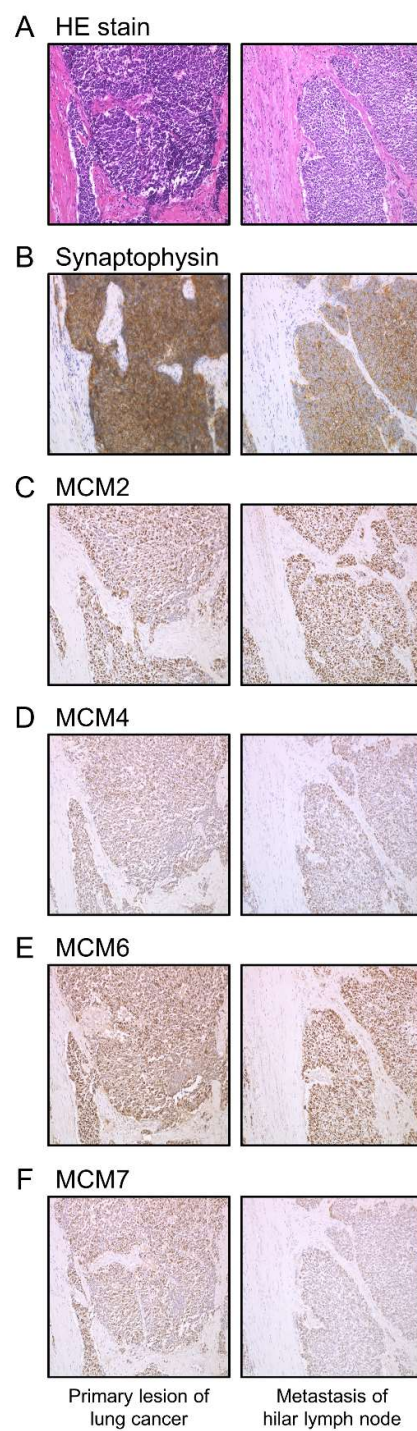

**Figure S2.** Histopathological findings and immunohistochemical analyses of MCM2, MCM4, MCM6, and MCM7 in case no. 2. (A-F) Overexpression of MCM2, MCM4, MCM6, and MCM7 was observed in the nuclei of cancer cells.

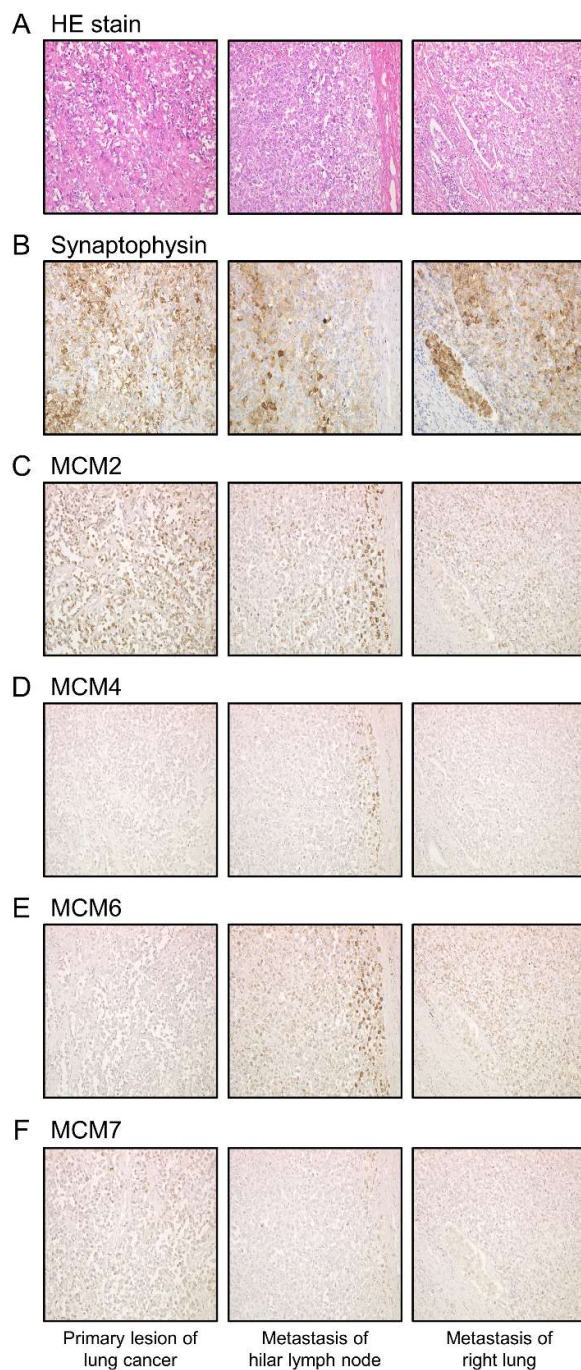

**Figure S3.** Histopathological findings and immunohistochemical analyses of MCM2, MCM4, MCM6, and MCM7 in case no. 3. (A-F) Overexpression of MCM2, MCM4, MCM6, and MCM7 was observed in the nuclei of cancer cells.

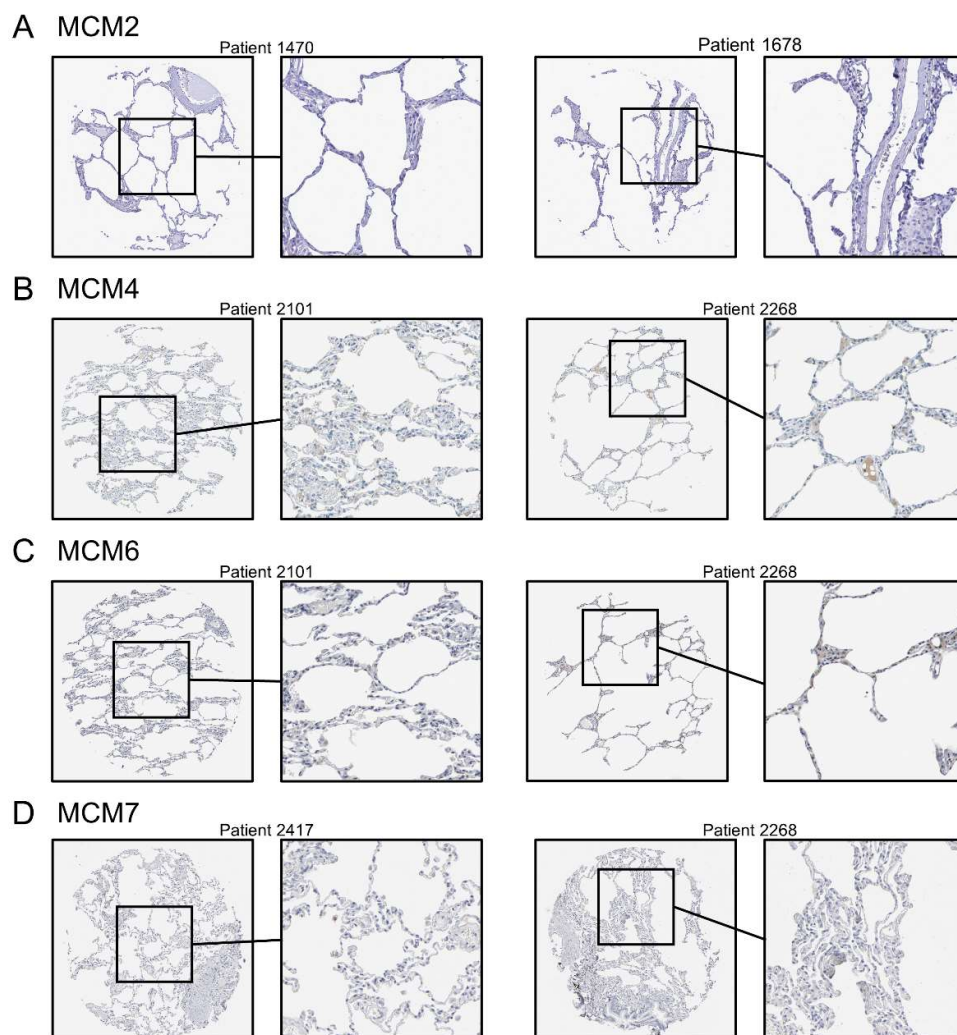

**Figure S4.** Histopathological findings and immunohistochemical analyses of MCM2, MCM4, MCM6, and MCM7 in normal lung tissue. (A-D) MCM family members were almost not detected in normal lung tissues (Credit: Image from the Human Protein Atlas).

A

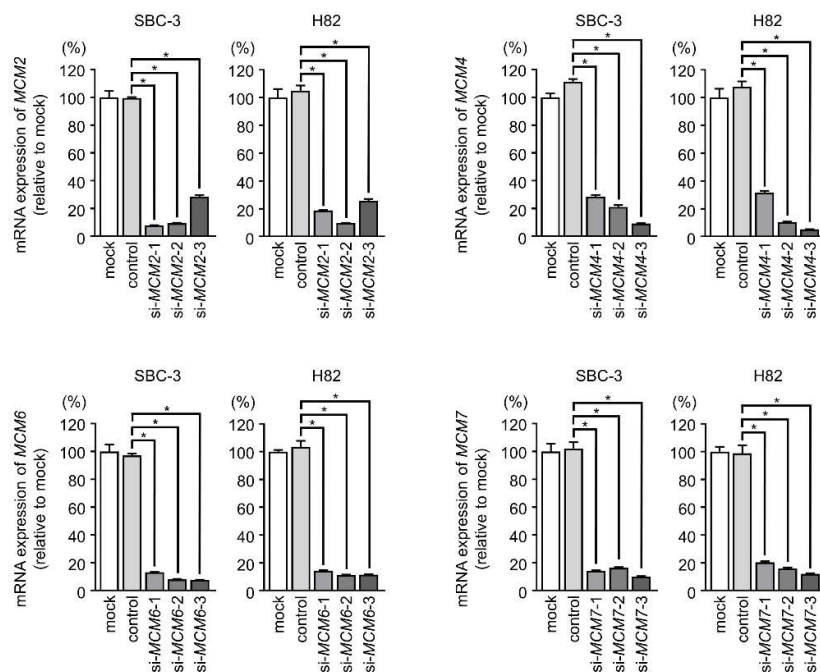



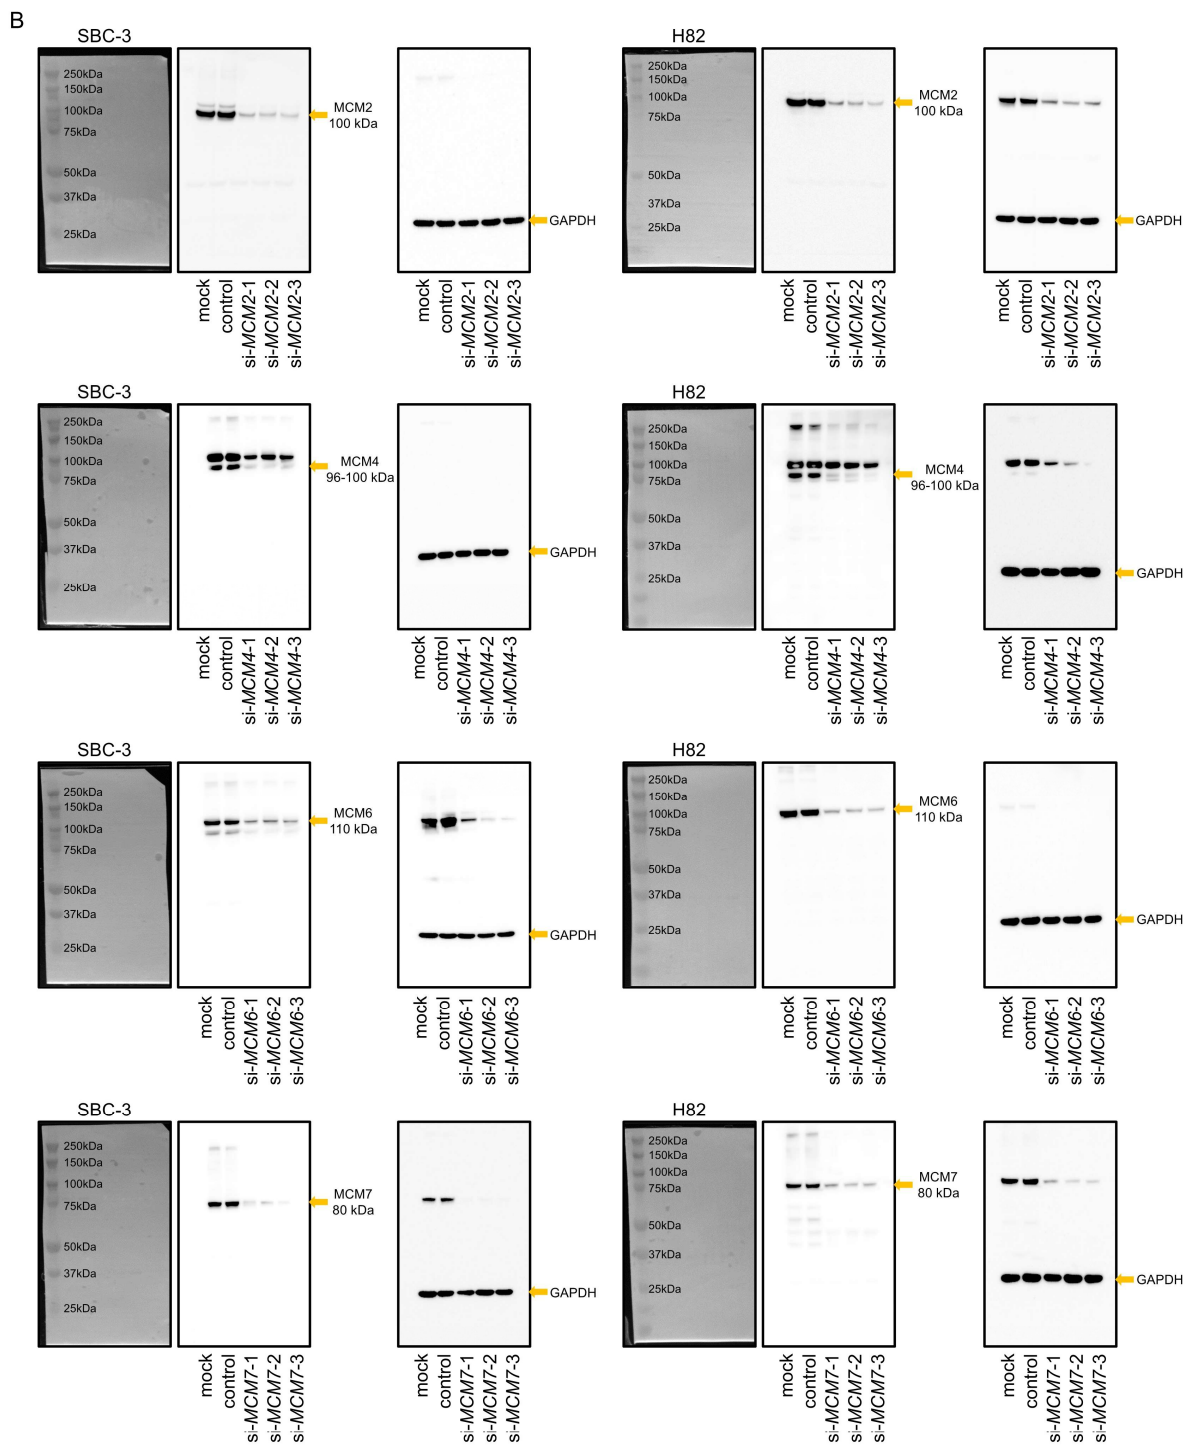

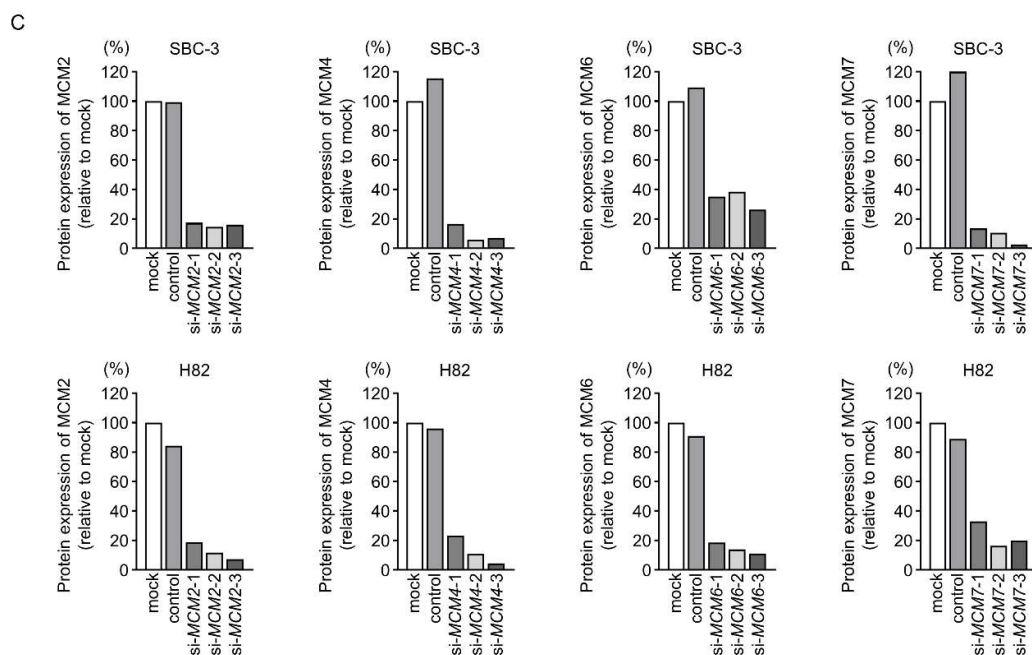

**Figure S5.** Downregulation of MCM family members by siRNA transfection in SCLC cells. Western blots for each MCM protein are shown. \*,  $p < 0.0001$ . (A, B) RT-PCR and western blotting showed that expression levels of both mRNA and protein were markedly reduced by both siRNAs. (C) The western blotting results were quantified by ImageJ.

A

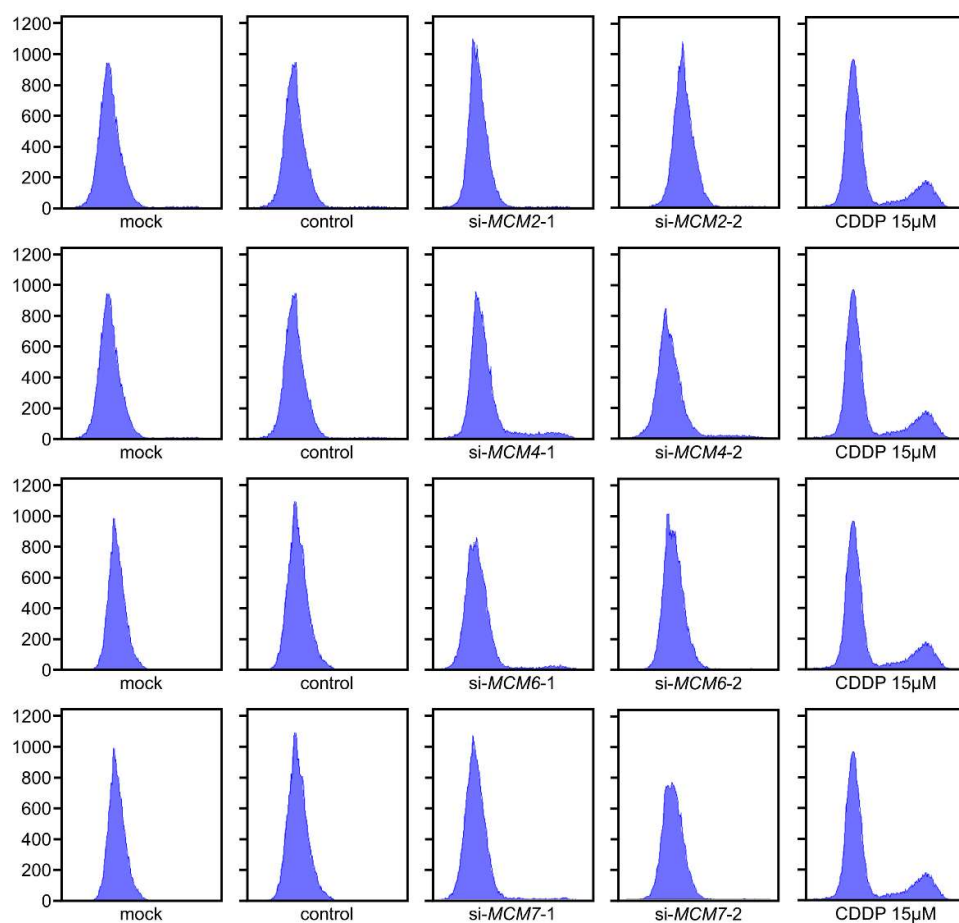



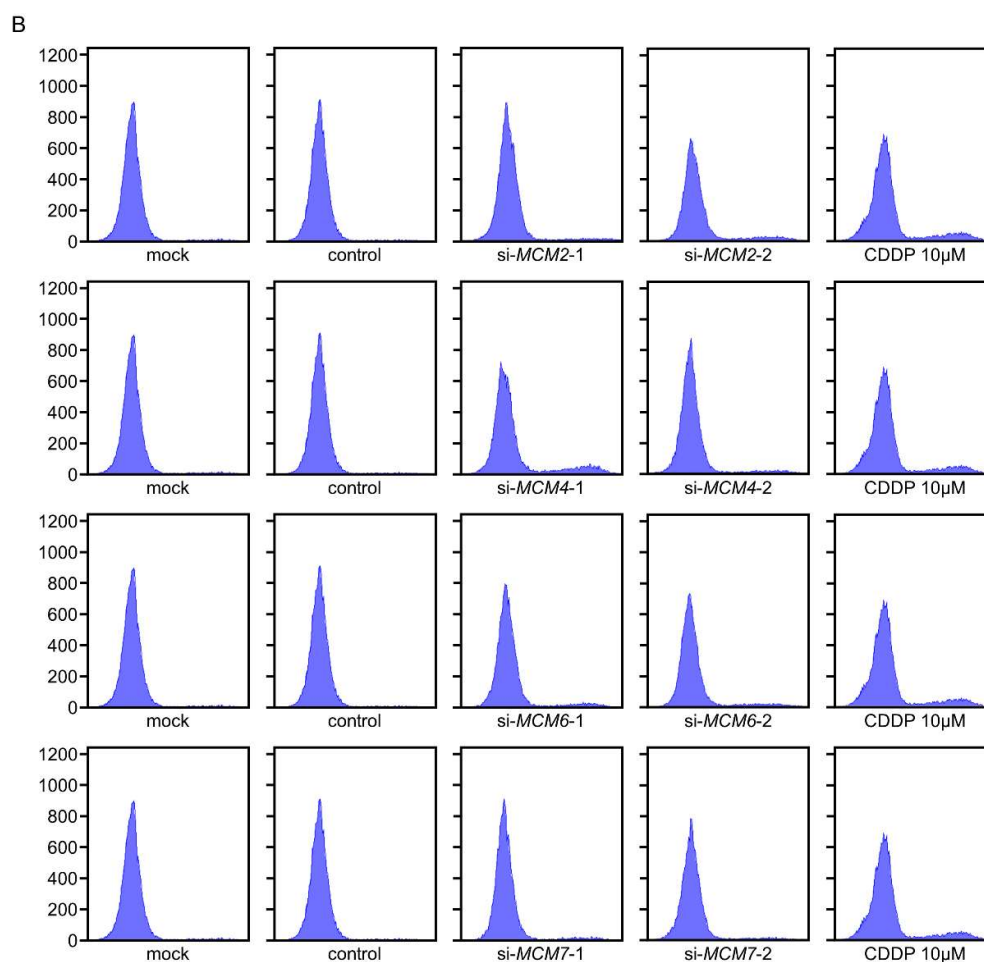

**Figure S6.** Apoptosis data obtained by flow cytometry from (A) SBC-3 and (B) H82 cells transfected with siRNAs targeting MCM2, MCM4, MCM6, and MCM7.

**Table S1.** Reagent used in this study.

| Supplemental Table 1. Reagent used in this study |                         |                |                                           |
|--------------------------------------------------|-------------------------|----------------|-------------------------------------------|
| Antibody                                         | Dilution                | Catalog number | Company                                   |
| Synaptophysin<br>(27G12)                         | IHC 1:100               | 413831         | Nichirei Biosciences, Inc. (Tokyo, Japan) |
| Chromogranin                                     | IHC 1:400               | 412751         | Nichirei Biosciences, Inc.                |
| CD56 (1B6)                                       | IHC 1:25                | 413331         | Nichirei Biosciences, Inc.                |
| MCM2                                             | IHC 1:1000<br>WB 1:1000 | ab4461         | Abcam (Cambridge, UK)                     |
| MCM4                                             | IHC 1:1000<br>WB 1:2000 | ab4459         | Abcam                                     |

| MCM6    | IHC 1:100<br>WB 1:2000 | ab4458                          | Abcam                                        |
|---------|------------------------|---------------------------------|----------------------------------------------|
| MCM7    | IHC 1:50<br>WB 1:200   | ab2360                          | Abcam                                        |
| GAPDH   | WB 1:20000             | MAB374                          | EMD Millipore (Billerica, MA, USA)           |
| siRNA   | Concentration          | Catalog number                  | Company                                      |
| si-MCM2 | 10 nM                  | HSS106390, HSS106392, HSS181044 | Invitrogen (Carlsbad, CA, USA)               |
| si-MCM4 | 10 nM                  | HSS106396, HSS106397, HSS106398 | Invitrogen                                   |
| si-MCM6 | 10 nM                  | HSS106402, HSS106403, HSS106404 | Invitrogen                                   |
| si-MCM7 | 10 nM                  | HSS106405, HSS106406, HSS181048 | Invitrogen                                   |
| probe   | Assay ID               |                                 | Company                                      |
| MCM2    | Hs01091564_m1          |                                 | Applied Biosystems<br>(Foster City, CA, USA) |
| MCM4    | Hs00907398_m1          |                                 | Applied Biosystems                           |
| MCM6    | Hs00962418_m1          |                                 | Applied Biosystems                           |
| MCM7    | Hs00428518_m1          |                                 | Applied Biosystems                           |
| GUSB    | Hs00939627_m1          |                                 | Applied Biosystems                           |

Table S2: Upregulated genes associated with Homologous recombination pathway.

| Entrez<br>GeneID | Gene<br>Symbol | GeneName                                                                         | Location | Normalized read count (Log <sub>2</sub> ) |                           |                 | p-value |
|------------------|----------------|----------------------------------------------------------------------------------|----------|-------------------------------------------|---------------------------|-----------------|---------|
|                  |                |                                                                                  |          | Log <sub>2</sub><br>fold<br>change        | Normal<br>lung<br>tissues | SCLC<br>tissues |         |
| 8438             | <i>RAD54L</i>  | RAD54-like                                                                       | 1p34.1   | 3.76                                      | 0.06                      | 3.82            | 0.0078  |
| 83990            | <i>BRIP1</i>   | BRCA1 interacting protein<br>C-terminal helicase 1                               | 17q23.2  | 3.42                                      | 0.05                      | 3.47            | 0.0010  |
| 25788            | <i>RAD54B</i>  | RAD54 homolog B                                                                  | 8q22.1   | 2.84                                      | 0.03                      | 2.87            | 0.0002  |
| 672              | <i>BRCA1</i>   | breast cancer 1, early onset                                                     | 17q21.31 | 2.46                                      | 0.11                      | 2.57            | 0.0006  |
| 5888             | <i>RAD51</i>   | RAD51 recombinase                                                                | 15q15.1  | 2.46                                      | 0.12                      | 2.58            | 0.0055  |
| 7516             | <i>XRCC2</i>   | X-ray repair complement-<br>ing defective repair in Chi-<br>nese hamster cells 2 | 7q36.1   | 2.37                                      | 0.06                      | 2.42            | 0.0261  |
| 675              | <i>BRCA2</i>   | breast cancer 2, early onset                                                     | 13q13.1  | 2.30                                      | -0.07                     | 2.23            | 0.0005  |
| 11073            | <i>TOPBP1</i>  | topoisomerase (DNA) II<br>binding protein 1                                      | 3q22.1   | 2.12                                      | 0.05                      | 2.18            | 0.0003  |
| 641              | <i>BLM</i>     | Bloom syndrome, RecQ<br>helicase-like                                            | 15q26.1  | 2.03                                      | 0.06                      | 2.10            | 0.0240  |

|      |       |                                                                                  |          |      |      |      |        |
|------|-------|----------------------------------------------------------------------------------|----------|------|------|------|--------|
| 7517 | XRCC3 | X-ray repair complement-<br>ing defective repair in Chi-<br>nese hamster cells 3 | 14q32.33 | 0.15 | 0.04 | 0.20 | 0.8186 |
|------|-------|----------------------------------------------------------------------------------|----------|------|------|------|--------|

**Table S3: Upregulated genes associated with DNA replication pathway.**

| Entrez<br>GeneID | Gene<br>Symbol | GeneName                                                          | Location | Log <sub>2</sub><br>fold<br>change | Normalized read count (Log <sub>2</sub> ) |                 | p-value |
|------------------|----------------|-------------------------------------------------------------------|----------|------------------------------------|-------------------------------------------|-----------------|---------|
|                  |                |                                                                   |          |                                    | Normal<br>lung<br>tissues                 | SCLC<br>tissues |         |
| 4173             | MCM4           | minichromosome<br>maintenance complex<br>component 4              | 8q11.21  | 3.33                               | 0.20                                      | 3.54            | 0.0004  |
| 4171             | MCM2           | minichromosome<br>maintenance complex<br>component 2              | 3q21.3   | 2.96                               | 0.01                                      | 2.97            | 0.0008  |
| 5427             | POLE2          | polymerase (DNA di-<br>rected), epsilon 2, ac-<br>cessory subunit | 14q21.3  | 2.69                               | -0.06                                     | 2.62            | 0.0016  |
| 5984             | RFC4           | replication factor C<br>(activator 1) 4                           | 3q27.3   | 2.31                               | -0.01                                     | 2.30            | 0.0007  |
| 5983             | RFC3           | replication factor C<br>(activator 1) 3                           | 13q13.2  | 2.26                               | 0.01                                      | 2.27            | 0.0013  |
| 4176             | MCM7           | minichromosome<br>maintenance complex<br>component 7              | 7q22.1   | 2.20                               | 0.13                                      | 2.33            | 0.0002  |
| 10535            | RNASEH2A       | ribonuclease H2, sub-<br>unit A                                   | 19p13.2  | 2.20                               | 0.08                                      | 2.27            | 0.0020  |
| 4175             | MCM6           | minichromosome<br>maintenance complex<br>component 6              | 2q21.3   | 2.05                               | -0.11                                     | 1.94            | 0.0002  |
| 5111             | PCNA           | proliferating cell nu-<br>clear antigen                           | 20p13    | 2.04                               | 0.01                                      | 2.05            | 0.0017  |

**Table S4: Upregulated genes associated with p53 signaling pathway.**

| Entrez<br>GeneID | Gene<br>Symbol | GeneName  | Location | Log <sub>2</sub><br>fold<br>change | Normalized read count (Log <sub>2</sub> ) |                 | p-value |
|------------------|----------------|-----------|----------|------------------------------------|-------------------------------------------|-----------------|---------|
|                  |                |           |          |                                    | Normal<br>lung<br>tissues                 | SCLC<br>tissues |         |
| 9134             | CCNE2          | cyclin E2 | 8q22.1   | 3.57                               | 0.05                                      | 3.62            | 0.0002  |

|       |               |                                                       |          |      |       |      |        |
|-------|---------------|-------------------------------------------------------|----------|------|-------|------|--------|
| 51512 | <i>GTSE1</i>  | G-2 and S-phase expressed 1                           | 22q13.31 | 3.20 | 0.04  | 3.24 | 0.0011 |
| 9133  | <i>CCNB2</i>  | cyclin B2                                             | 15q22.2  | 3.05 | 0.05  | 3.10 | 0.0055 |
| 1029  | <i>CDKN2A</i> | cyclin-dependent kinase inhibitor 2A                  | 9p21.3   | 3.01 | 0.24  | 3.25 | 0.0047 |
| 6241  | <i>RRM2</i>   | ribonucleotide reductase M2                           | 2p25.1   | 3.00 | -0.29 | 2.71 | 0.0021 |
| 891   | <i>CCNB1</i>  | cyclin B1                                             | 5q13.2   | 2.82 | -0.06 | 2.76 | 0.0008 |
| 898   | <i>CCNE1</i>  | cyclin E1                                             | 19q12    | 2.61 | 0.06  | 2.67 | 0.0041 |
| 1111  | <i>CHEK1</i>  | CHK1 checkpoint homolog                               | 11q24.2  | 2.57 | 0.00  | 2.57 | 0.0088 |
| 983   | <i>CDK1</i>   | cyclin-dependent kinase 1                             | 10q21.2  | 2.40 | 0.05  | 2.45 | 0.0058 |
| 56475 | <i>RPRM</i>   | represso, TP53 dependent G2 arrest mediator candidate | 2q23.3   | 2.30 | 0.10  | 2.40 | 0.0499 |

---
